# Supplementary material for: Identifying and validating blood mRNA biomarkers for acute and chronic insufficient sleep in humans: a machine learning approach
Source: PubMed Central journal article supplement (PMC6335875; doi:10.1093/sleep/zsy186), 2018-09-24

# 'Acute sleep loss, between-subject'

**PP1R13B (A\_23\_P205273)**  
Training set, SS

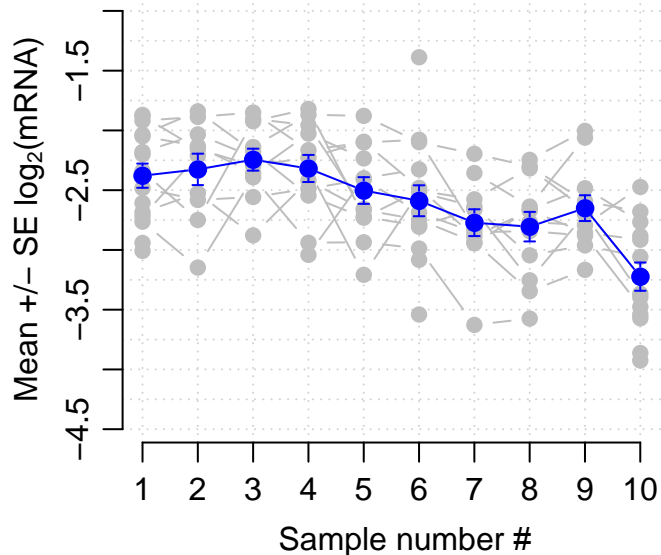

**PP1R13B (A\_23\_P205273)**  
Training set, IS

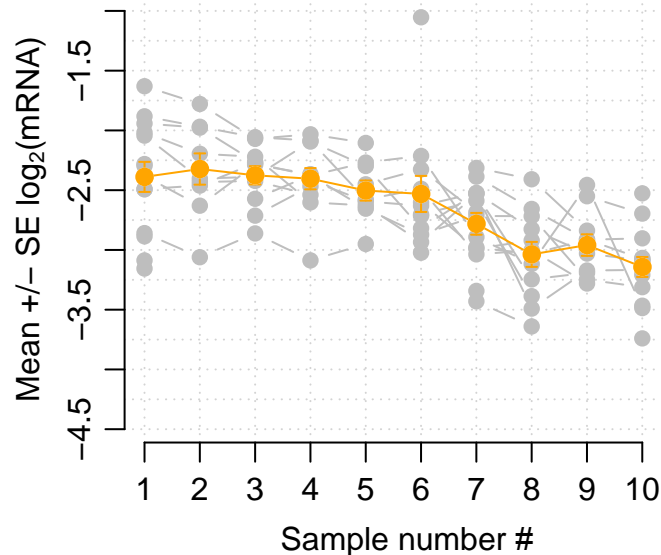

**PP1R13B (A\_23\_P205273)**  
Validation set, SS

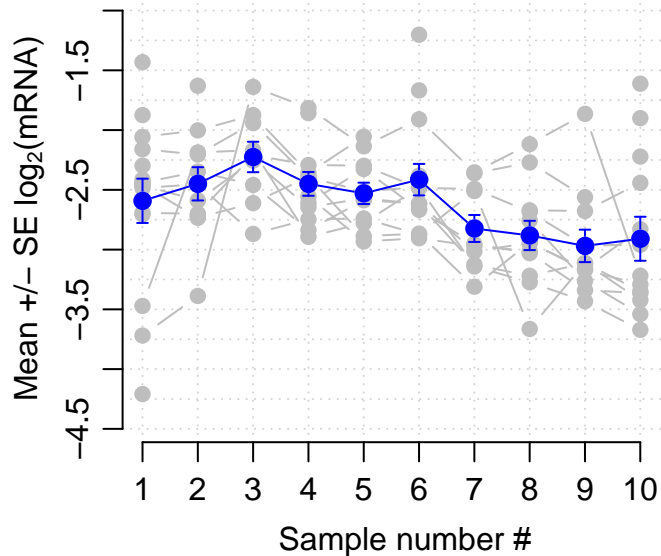

**PP1R13B (A\_23\_P205273)**  
Validation set, IS

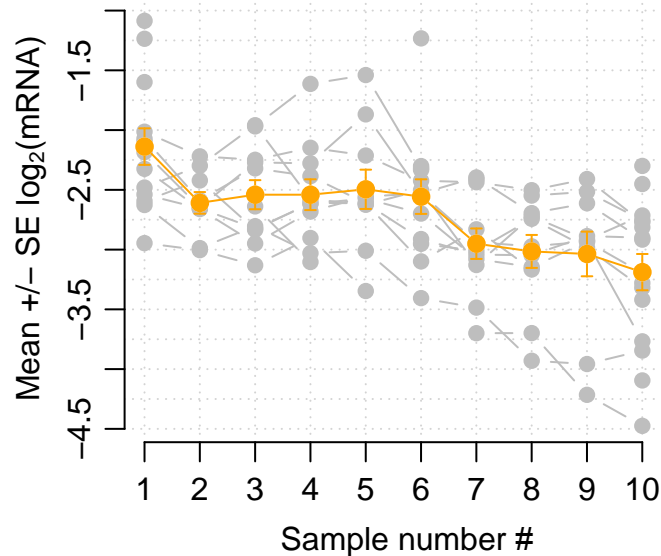

'Sleep increase/decrease'

**UBE2F (A\_32\_P104825)**  
**Training set**

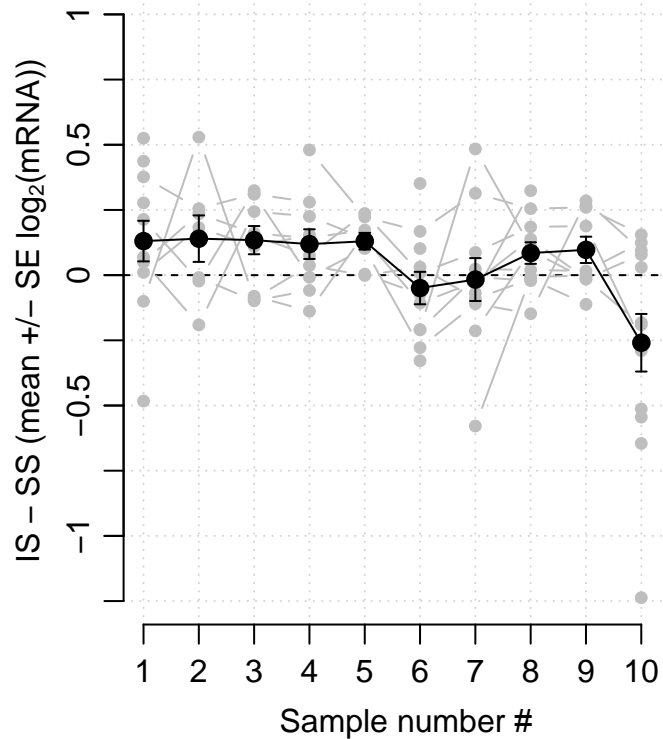

**UBE2F (A\_32\_P104825)**  
**Validation set**

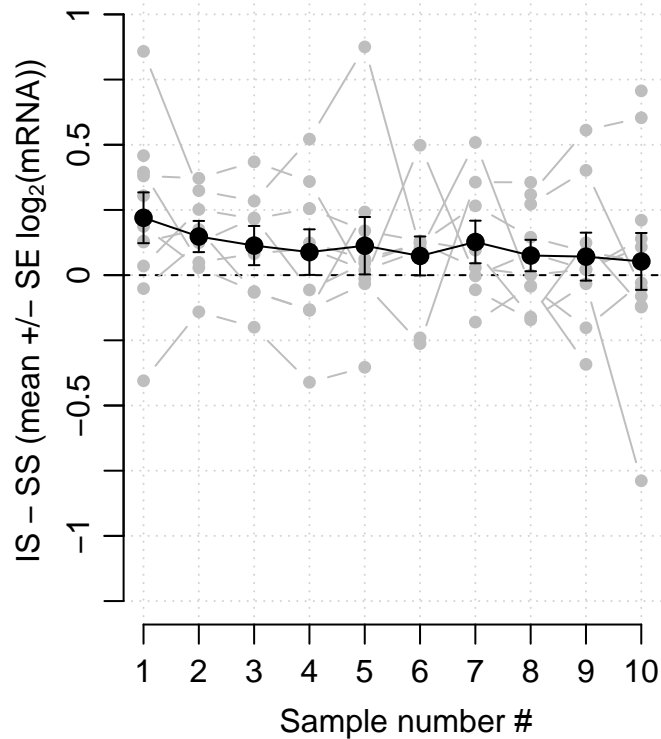

Supplement: zsy186_suppl_supplementary_file_s2.pdf [file zsy186_suppl_supplementary_file_s2.pdf]
